# Supplementary material
Source: Springer Nature journal article supplement (https://www.springermedizin.de/resource/supplementary/12967_2013_1734_MOESM9_ESM.pdf/9575138)
Supplement: MOESM9 [file 9575138]

## Chemoradiotherapy

Therapeutic effectiveness

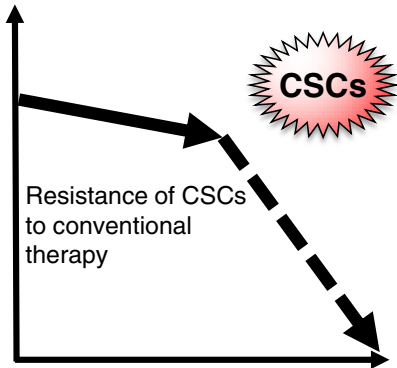

Malignancy

## m-CRA virotherapy

Therapeutic effectiveness

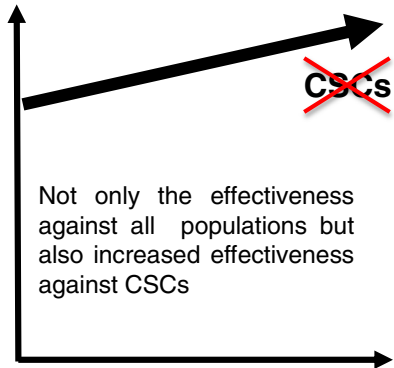

Malignancy
